# Supplementary material for: Probing spatiotemporal PKA activity at the ryanodine receptor and SERCA2a nanodomains in cardomyocytes
Source: PubMed Central journal article supplement (PMC9472443; doi:10.1186/s12964-022-00947-8), 2022-09-14

Figure 1C Original Gels

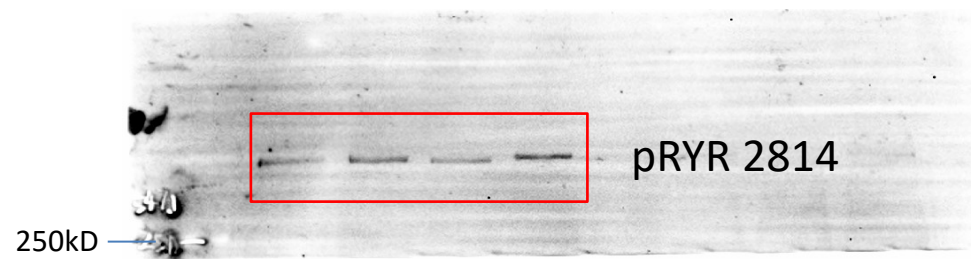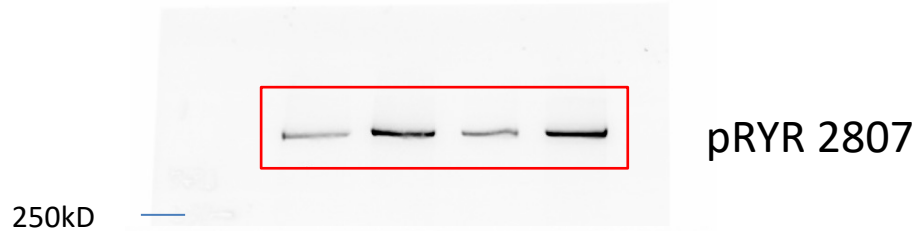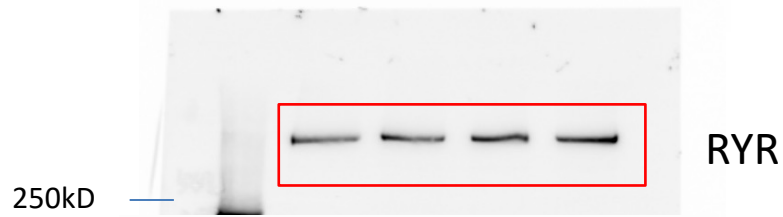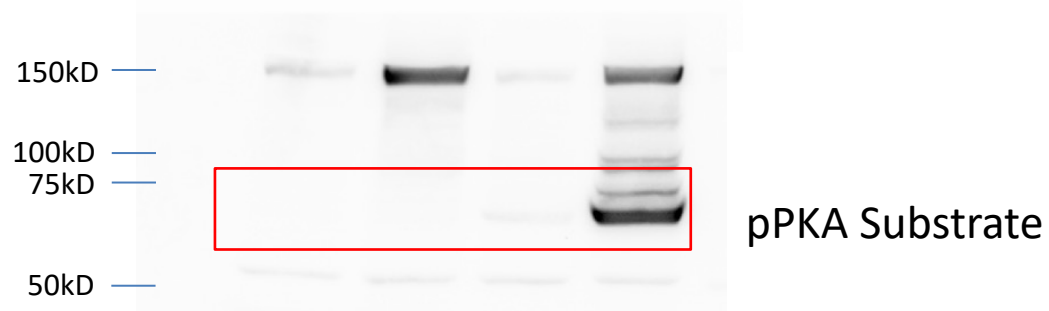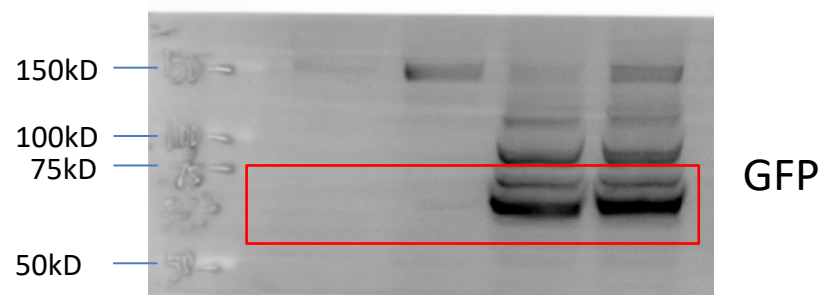

Supplement: 12964_2022_947_MOESM2_ESM.pdf [file 12964_2022_947_MOESM2_ESM.pdf]
